# Supplementary material
Source: PubMed Central journal article supplement (PMC5321069)
Supplement: NIHMS847788-supplement-1.pdf [file NIHMS847788-supplement-1.pdf]

**Table S1**

The list of the 90 anatomical regions used to construct the brain networks

| Index  | Regions                             | Abbreviation | Index  | Regions                  | Abbreviation |
|--------|-------------------------------------|--------------|--------|--------------------------|--------------|
| 1, 2   | Precentral gyrus                    | PreCG        | 47, 48 | Lingual gyrus            | LING         |
| 3, 4   | Superior frontal gyrus (dorsal)     | SFGdor       | 49, 50 | Superior occipital gyrus | SOG          |
| 5, 6   | Orbital frontal cortex (superior)   | ORBsup       | 51, 52 | Middle occipital gyrus   | MOG          |
| 7, 8   | Middle frontal gyrus                | MFG          | 53, 54 | Inferior occipital gyrus | IOG          |
| 9, 10  | Orbital frontal cortex (middle)     | ORBmid       | 55, 56 | Fusiform gyrus           | FFG          |
| 11, 12 | Inferior frontal gyrus (opercula)   | IFGoperc     | 57, 58 | Postcentral gyrus        | PoCG         |
| 13, 14 | Inferior frontal gyrus (triangular) | IFGtriang    | 59, 60 | Superior parietal gyrus  | SPG          |
| 15, 16 | Orbital frontal cortex (inferior)   | ORBinf       | 61, 62 | Inferior parietal lobule | IPL          |
| 17, 18 | Rolandic operculum                  | ROL          | 63, 64 | Supramarginal gyrus      | SMG          |
| 19, 20 | Supplementary motor area            | SMA          | 65, 66 | Angular gyrus            | ANG          |
| 21, 22 | Olfactory                           | OLF          | 67, 68 | Precuneus                | PCUN         |
| 23, 24 | Superior frontal gyrus (Medial)     | SFGmed       | 69, 70 | Paracentral lobule       | PCL          |
| 25, 26 | Orbital frontal cortex (Medial)     | ORBmed       | 71, 72 | Caudate                  | CAU          |
| 27, 28 | Rectus gyrus                        | REC          | 73, 74 | Putamen                  | PUT          |
| 29, 30 | Insular                             | INS          | 75, 76 | Pallidum                 | PAL          |
| 31, 32 | Anterior cingulum gyrus             | ACG          | 77, 78 | Thalamus                 | THA          |
| 33, 34 | Middle cingulum gyrus               | MCG          | 79, 80 | Heschl gyrus             | HES          |
| 35, 36 | Posterior cingulum gyrus            | PCG          | 81, 82 | Superior temporal gyrus  | STG          |
| 37, 38 | Hippocampus                         | HIP          | 83, 84 | Temporal pole (superior) | TPOsup       |
| 39, 40 | Parahippocampal gyrus               | PHG          | 85, 86 | Middle temporal gyrus    | MTG          |
| 41, 42 | Amygdala                            | AMYG         | 87, 88 | Temporal pole (middle)   | TPOmid       |
| 43, 44 | Calcarine cortex                    | CAL          | 89, 90 | Inferior temporal gyrus  | ITG          |
| 45, 46 | Cuneus                              | CUN          |        |                          |              |

90 ROIs are obtained from the Automated Anatomical Labeling (AAL) brain atlas (Tzourio-Mazoyer et al., 2002). Odd numbers of index refer to regions in the left hemisphere, and even numbers of index refer to the regions in the right hemisphere.

**Table S2**

Details of measures by HAMD in MDD patients

| Case | Total score | Factor 1 | Factor 2 | Factor 3 | Factor 4 | Factor 5 | Factor 6 | Factor 7 | Helplessness item | Hopelessness item | Worthlessness item |
|------|-------------|----------|----------|----------|----------|----------|----------|----------|-------------------|-------------------|--------------------|
| 1    | 23          | 5        | 0        | 2        | 1        | 7        | 2        | 5        | 3                 | 1                 | 1                  |
| 2    | 27          | 6        | 1        | 1        | 2        | 9        | 3        | 4        | 2                 | 1                 | 1                  |
| 3    | 23          | 3        | 1        | 1        | 1        | 7        | 4        | 2        | 1                 | 0                 | 1                  |
| 4    | 34          | 8        | 2        | 3        | 2        | 9        | 2        | 9        | 4                 | 2                 | 3                  |
| 5    | 33          | 6        | 0        | 7        | 1        | 9        | 3        | 6        | 4                 | 1                 | 1                  |
| 6    | 35          | 8        | 1        | 2        | 2        | 8        | 6        | 8        | 4                 | 1                 | 3                  |
| 7    | 22          | 3        | 1        | 6        | 1        | 6        | 3        | 3        | 2                 | 0                 | 1                  |
| 8    | 37          | 8        | 2        | 4        | 1        | 11       | 6        | 3        | 2                 | 0                 | 1                  |
| 9    | 37          | 9        | 2        | 5        | 1        | 10       | 5        | 4        | 2                 | 1                 | 1                  |
| 10   | 20          | 3        | 1        | 4        | 1        | 6        | 3        | 3        | 2                 | 0                 | 1                  |
| 11   | 34          | 8        | 2        | 7        | 0        | 7        | 5        | 5        | 3                 | 1                 | 1                  |
| 12   | 49          | 11       | 2        | 9        | 1        | 9        | 6        | 10       | 4                 | 2                 | 4                  |
| 13   | 34          | 6        | 2        | 4        | 2        | 9        | 6        | 4        | 2                 | 0                 | 2                  |
| 14   | 36          | 8        | 2        | 3        | 2        | 9        | 2        | 9        | 4                 | 2                 | 3                  |
| 15   | 26          | 2        | 0        | 6        | 2        | 8        | 3        | 4        | 2                 | 1                 | 1                  |
| 16   | 24          | 3        | 2        | 1        | 1        | 7        | 4        | 5        | 3                 | 0                 | 2                  |

The total score is based on 24-item version of Hamilton Depression Scale (HAMD), which measures the illness severity. The HAMD scale is consisted of seven factors, which measure seven symptom groups, e.g., factor 1 - anxiety/somatization, factor 2 - change of weight, factor 3 - cognitive dysfunction, factor 4 - atypical circadian rhythm, factor 5 - retardation, factor 6 - sleep disorder, and factor 7 - desperation. And, the factor desperation includes three items, helplessness, hopelessness, and worthlessness (Zhang, 1998).

**Table S3**

List of impaired connections in the sub-network, detected by NBS in MDD group, compared to control group

| Region A   | Region B | Regional correlation ( <i>r</i> , mean) |         | Significance ( <i>p</i> ) |
|------------|----------|-----------------------------------------|---------|---------------------------|
|            |          | MDD                                     | Control |                           |
| SMA.L      | OLF.R    | 0.1105                                  | 0.2769  | 0.0027                    |
| INS.L      | HIPL     | 0.2273                                  | 0.3805  | 0.0041                    |
| SMA.L      | CUN.L    | 0.1948                                  | 0.4058  | 0.0007                    |
| INS.L      | SOGL     | 0.1803                                  | 0.3412  | 0.0019                    |
| IFGoperc.L | SOGR     | 0.1084                                  | 0.2847  | 0.0019                    |
| SMA.L      | SOGR     | 0.1863                                  | 0.3575  | 0.0023                    |
| INS.L      | SOGR     | 0.1992                                  | 0.3693  | 0.0022                    |
| INS.R      | SOGR     | 0.1990                                  | 0.3746  | 0.0015                    |
| ORBsup.R   | SMGR     | 0.1818                                  | 0.3466  | 0.0003                    |
| ORBmid.R   | SMGR     | 0.2556                                  | 0.4456  | 0.0036                    |
| OLF.L      | SMGR     | 0.1093                                  | 0.2604  | 0.0020                    |
| OLF.R      | SMGR     | 0.1282                                  | 0.2931  | 0.0008                    |
| AMYGR      | SMGR     | 0.1552                                  | 0.3486  | 0.0016                    |
| ORBmid.R   | ANGR     | 0.3437                                  | 0.5639  | 0.0021                    |
| ORBmid.L   | PUT.L    | 0.2235                                  | 0.4209  | 0.0035                    |
| AMYGR      | PUT.L    | 0.4695                                  | 0.7023  | 0.0017                    |
| SMGR       | PUT.L    | 0.2215                                  | 0.4156  | 0.0021                    |
| ORBmid.L   | PUT.R    | 0.2296                                  | 0.4156  | 0.0028                    |
| IPL.R      | PUT.R    | 0.1382                                  | 0.3268  | 0.0031                    |
| SMGR       | PAL.R    | 0.2035                                  | 0.4004  | 0.0025                    |
| SMA.L      | THA.R    | 0.2410                                  | 0.4356  | 0.0034                    |
| SMGR       | TPOsup.L | 0.2458                                  | 0.4364  | 0.0007                    |
| AMGL       | ITGR     | 0.2093                                  | 0.3722  | 0.0028                    |
| PUT.R      | ITGR     | 0.2153                                  | 0.4161  | 0.0023                    |

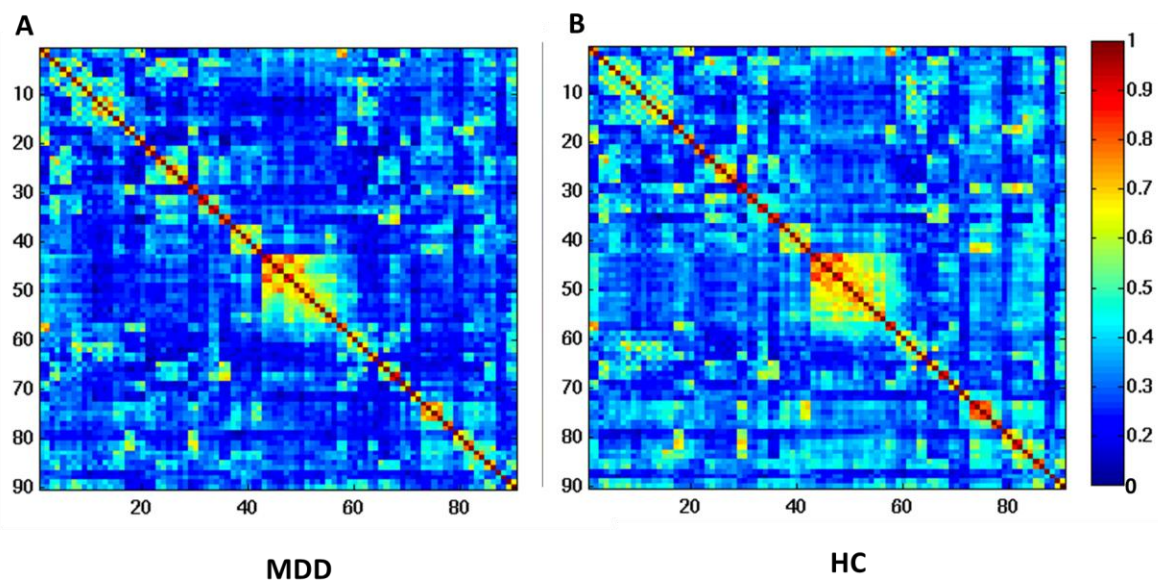

**Fig. S1.** The illustration of mean correlation matrices of both major depression disorder (MDD) and health control (HC) groups.

## Functional network construction based on wavelet

The maximal overlap discrete wavelet transform method was first employed to decompose each individual regional-mean fMRI time series into 4 wavelet scales: scale 1, 0.125–0.250 Hz; scale 2, 0.060–0.125 Hz; scale 3, 0.030–0.060 Hz; and scale 4, 0.015–0.030 Hz (Percival and Walden, 2006). As initial analysis found that the significant group difference of wavelet correlation is mainly observed in scale 2 (Lynall et al. , 2010), the scale 2 was used in the subsequent analysis. Then, the Pearson correlation coefficients between all pairs of 90 brain regions were calculated based on the wavelet coefficients (Wang et al. , 2013). The brain correlation matrices were obtained in the native space. After registering a brain template to each individual brain, we will have brain regions defined in individual native space. From that, we calculate the correlation matrices for each subject in native space. Finally, a 90×90 correlation matrix was obtained for each subject (with the matrix figure shown in Fig. S1).

## Small-world Analysis

Individual correlation matrices were transformed to binary format at a wide range of network sparsity levels for further evaluation. The criteria we adopted is that, at the smallest sparsity, the average number of connections linked to each node is larger than  $2 \times \log(N)$ , where  $N = 90$  (Zhang et al. , 2011). At the highest sparsity, the small-worldness scalar is larger than 1.6. Finally, the sparsity range between 0.11 and 0.38 was determined as the small-world regime with an interval of 0.01.

Both clustering coefficient  $C_p$  and characteristic path length  $L_p$  were used to measure the properties of small-worldness (Watts and Strogatz, 1998). The clustering coefficient  $C_i$  measures the ratio of the number of existing connections among the  $i$ -th node's neighbors and all their possible connections.  $C_p$  is the average of clustering coefficients over all nodes in a network.  $L_p$  is the shortest path length transferring from one node to another among all pairs of nodes in a network, which indicates the overall routing efficiency in the network (Watts and Strogatz, 1998).

Based on Latora and Marchiori's model (Latora and Marchiori, 2001), the global efficiency of the graph  $G$  with  $N$  nodes and  $K$  edges is defined as follows:

$$E_{glob}(G) = \frac{1}{N(N-1)} \sum_{i \neq j \in G} \frac{1}{d_{ij}},$$

where  $d_{ij}$  is the shortest path length between node  $i$  and node  $j$  in  $G$ .

The following equation computes the local efficiency of a network  $G$ :

$$E_{loc}(G) = \frac{1}{N} \sum E_{glob}(G_i),$$

where  $E_{glob}(G_i)$  is the global efficiency of  $G_i$ , a sub-graph of the neighbors of node  $i$ .

### Network Modularity Analysis

The property of modularity in a network is proposed by Newman and Girvan (Newman and Girvan, 2004). The maximum network modularity  $Q(m)$  is defined as below:

$$Q(m) = \sum_{s=1}^{n_m} \left[ \frac{h_s}{L} - \left( \frac{T_s}{2L} \right)^2 \right],$$

where  $m$  is the configuration of modular organization with  $n_m$  modules,  $h_s$  is the sum of the edge weights between nodes in module  $s$ ,  $L$  is the total weight of edges of this graph,  $T_s$  is the sum of the weights of nodes in module  $s$ . The node weight is defined as the sum of edge weights connecting the node. An optimum network partition  $m$  is determined by assigning the nodes into a number of modules that achieve the maximum network modularity  $Q(m)$ .

The participation coefficient (PC) and intra-module degree (MD) for each node are used as indices for inter- and intra-module connection densities, respectively (Guimera and Nunes Amaral, 2005). For a node  $i$  in module  $s$ , the participation coefficient,  $PC_i$ , is measured by the regional inter-module connectivity of node  $i$ . The PC of node  $i$  will be close to 0 if all weights are largely intramodular. The  $PC_i$  is defined as:

$$PC_i = 1 - \hat{a}_{s=1}^{N_M} (w_{is}/w_i),$$

where  $N_M$  is the number of modules;  $w_{is}$  is the sum of edge weights between the node  $i$  and module  $s$ ;  $w_i$  is the total weight of node  $i$  in the network. And, its intra-module degree,  $MD_i$ , is measured by its regional intra-module connectivity  $w_i$ , scaled by the average and standard deviation of intra-modular degree for all nodes in the module. The  $MD_i$  is defined by the equation:

$MD_i = (w_i - \overline{W_s})/\sigma_s$ , where  $w_i$  is the regional intra-module connectivity; the  $\overline{W_s}$  and  $\sigma_s$  are the average and standard deviation, respectively (Rubinov and Sporns, 2010).

### Network Based Statistic Analysis

The network based statistic (NBS) approach was used to localize any sub-network with multiple pairwise regional correlations significantly altered in the major depressive disorder (MDD), compared to health controls (Zalesky et al. , 2010). To promote normality, Fisher's  $r$ -to- $z$  transform was first applied to individual correlation matrices in an element-by-element manner (Press et al. , 1992). Then, a set of suprathreshold links were tested by the  $t$ -statistic (two-sample one-tailed  $t$ -tests), and thresholding with  $p < 0.05$  (corrected). Any connected components and their size (e.g., the number of links) were detected within the set of suprathreshold links. The significance of a component was assessed based on its size. Specifically, for a connected component of size  $M$ , the corrected  $p$ -value was determined by finding the proportion of the 5000 permutations for which the maximal connected component was larger than  $M$  (Zalesky and Fornito, 2010).

## References

- Guimera R, Nunes Amaral LA. Functional cartography of complex metabolic networks. *Nature* 2005;433:895-900.
- Latora V, Marchiori M. Efficient behavior of small-world networks. *Phys Rev Lett* 2001;87:198701.
- Lynall ME, Bassett DS, Kerwin R, McKenna PJ, Kitzbichler M, Muller U, et al. Functional connectivity and brain networks in schizophrenia. *J Neurosci* 2010;30:9477-87.
- Newman ME, Girvan M. Finding and evaluating community structure in networks. *Phys Rev E Stat Nonlin Soft Matter Phys* 2004;69:026113.
- Percival DB, Walden AT. *Wavelet methods for time series analysis*. UK: Cambridge University Press; 2006.
- Press WH, Teukolsky SA, Vetterling WT, Flannery BP. *Numerical recipes in C : the art of scientific computing*. 2nd ed. UK: Cambridge University Press; 1992.
- Rubinov M, Sporns O. Complex network measures of brain connectivity: uses and interpretations. *Neuroimage* 2010;52:1059-69.
- Tzourio-Mazoyer N, Landeau B, Papathanassiou D, Crivello F, Etard O, Delcroix N, et al. Automated anatomical labeling of activations in SPM using a macroscopic anatomical parcellation of the MNI MRI single-subject brain. *Neuroimage* 2002;15:273-89.
- Wang J, Zuo X, Dai Z, Xia M, Zhao Z, Zhao X, et al. Disrupted functional brain connectome in individuals at risk for Alzheimer's disease. *Biol Psychiatry* 2013;73:472-81.
- Watts DJ, Strogatz SH. Collective dynamics of 'small-world' networks. *Nature* 1998;393:440-2.
- Zalesky A, Fornito A, Bullmore ET. Network-based statistic: identifying differences in brain networks. *Neuroimage* 2010;53:1197-207.
- Zhang J, Wang J, Wu Q, Kuang W, Huang X, He Y, et al. Disrupted brain connectivity networks in drug-naive, first-episode major depressive disorder. *Biol Psychiatry* 2011;70:334-42.
- Zhang MY. *Rating scales manual for mental health*. Hunan: Hunan Science and Technology Press; 1998.
